# Supplementary material
Source: PubMed Central journal article supplement (PMC6776051)
Supplement: 41396_2019_372_MOESM8_ESM.pdf [file 41396_2019_372_MOESM8_ESM.pdf]

Putative pathogenicity islet II

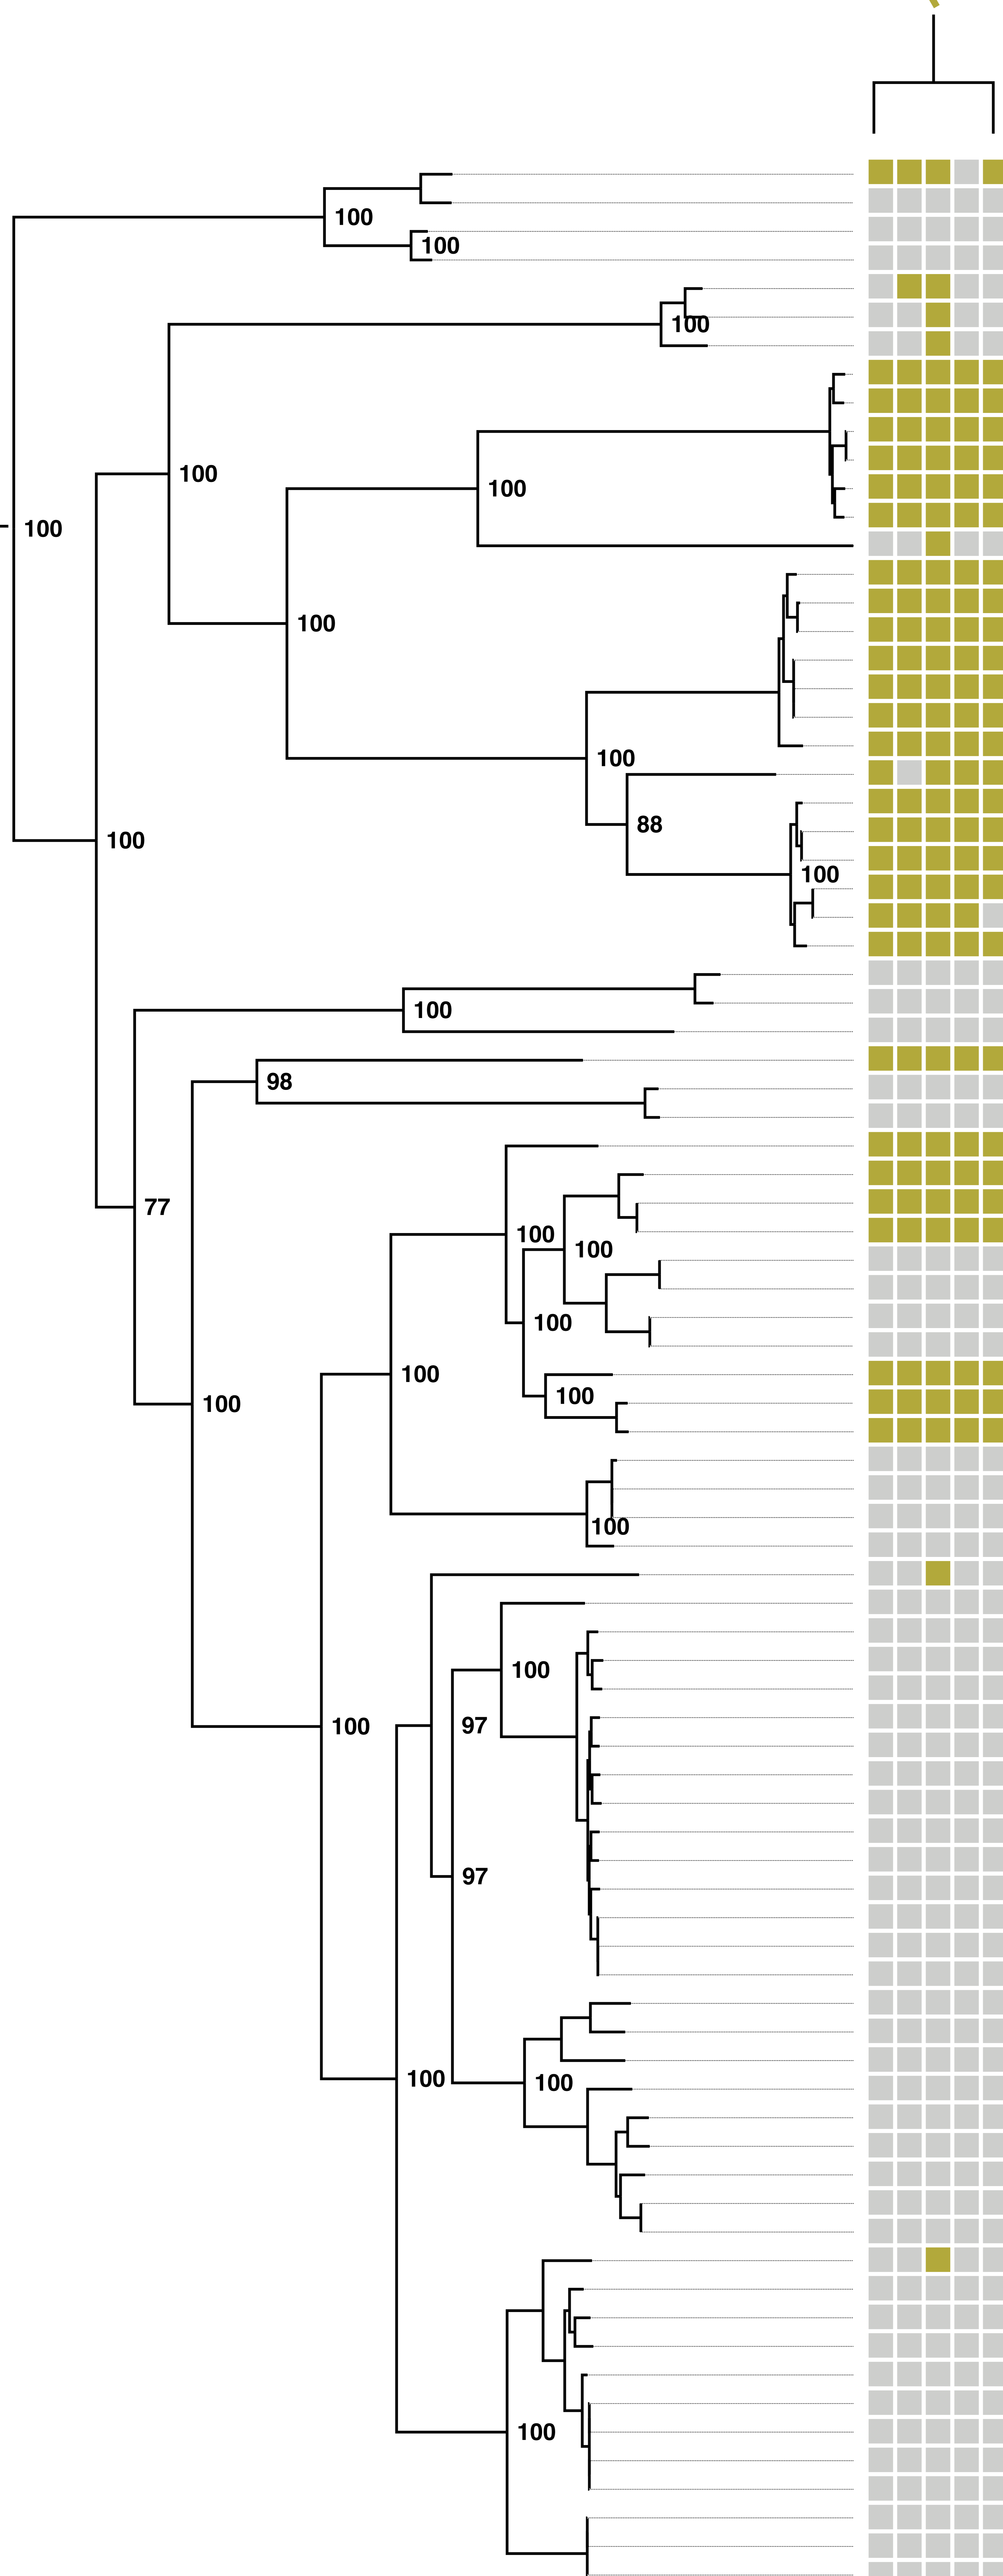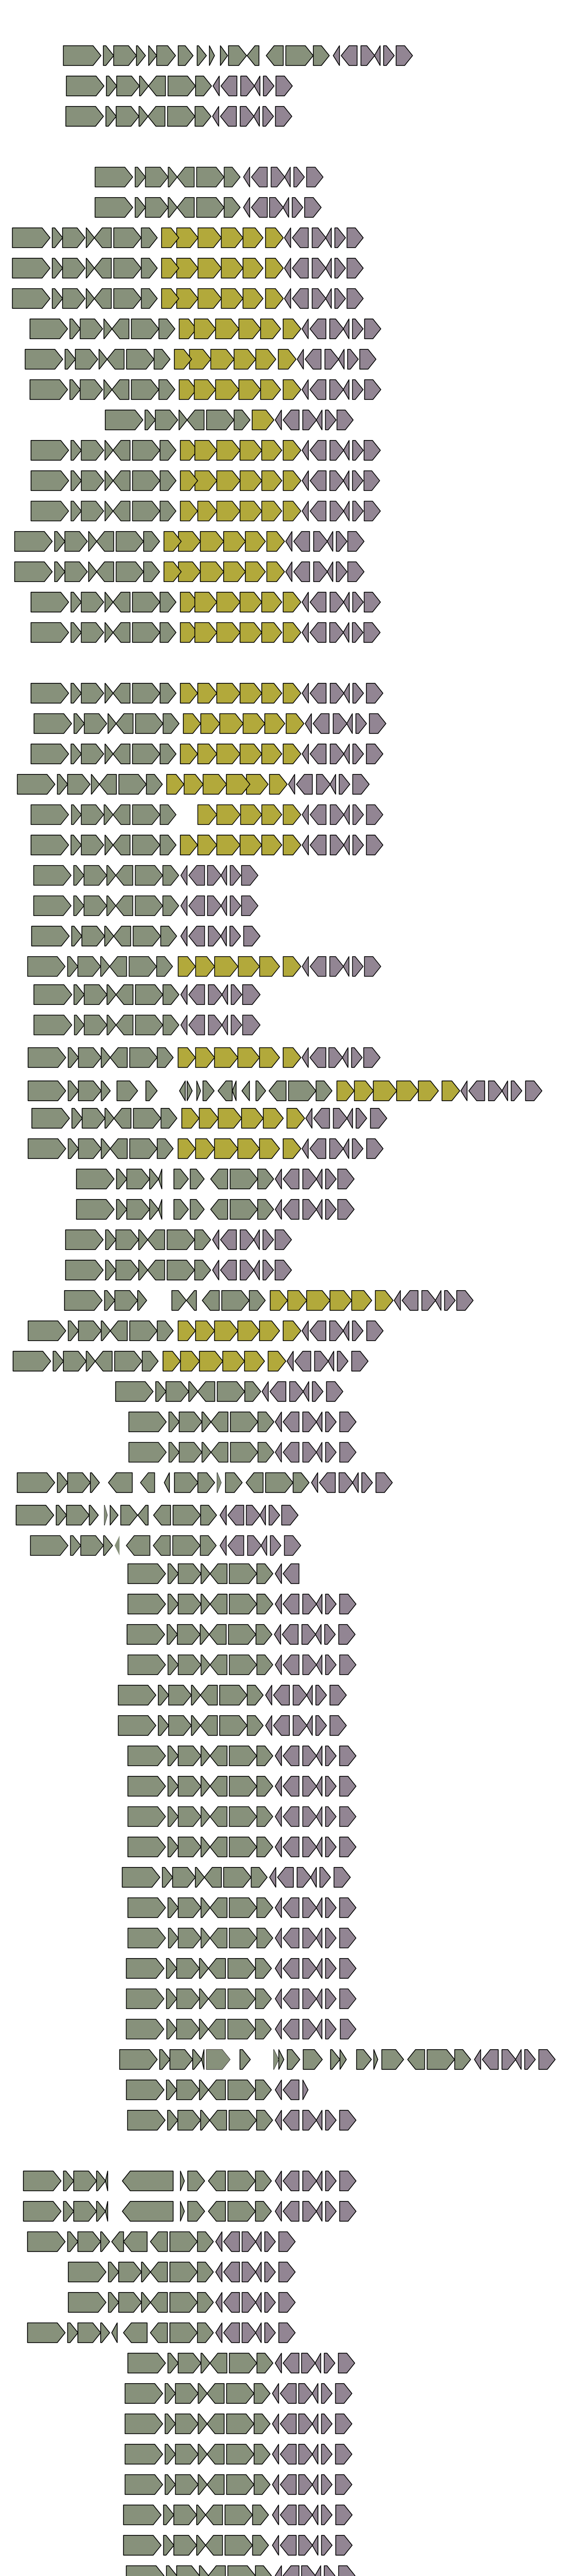

- Pseudomonas* sp. NFACC45
- Pseudomonas* sp. NFACC39
- Pseudomonas* sp. A214
- Pseudomonas brassicacearum* GCA001017815
- Pseudomonas fluorescens* GCA000836415
- Pseudomonas chlororaphis* GCA001023535
- Pseudomonas* sp. P97-38
- Pseudomonas* sp. NFACC09
- Pseudomonas* sp. 7SR1
- Pseudomonas* sp. NFACC47
- Pseudomonas* sp. NFACC43
- Pseudomonas* sp. NFACC49
- Pseudomonas* sp. NFACC32
- Pseudomonas* sp. Pf153
- Pseudomonas corrugata* CFBP 5454
- Pseudomonas corrugata* GCA001412195
- Pseudomonas corrugata*
- Pseudomonas corrugata* GCA001411965
- Pseudomonas corrugata* GCA900106085
- Pseudomonas corrugata* DSM 7228
- Pseudomonas corrugata* GCA001412065
- Pseudomonas* sp. SHC52
- Pseudomonas mediterranea*
- Pseudomonas mediterranea* GCA001412045
- Pseudomonas mediterranea* GCA001412185
- Pseudomonas mediterranea* GCA900106005
- Pseudomonas mediterranea* CFBP 5447**
- Pseudomonas mediterranea* GCA001412005
- Pseudomonas frederiksbergensis*
- Pseudomonas fluorescens* GCA000952735
- Pseudomonas fluorescens* Pf29Arp
- Pseudomonas brassicacearum* DF41**
- Pseudomonas* sp. Q12-87
- Pseudomonas fluorescens* Q2-87
- Pseudomonas* sp. NFACC04
- Pseudomonas* sp. NFACC13
- Pseudomonas* sp. NFACC14
- Pseudomonas* sp. NFACC15
- Pseudomonas* sp. NFIX10
- Pseudomonas* sp. NFACC06
- Pseudomonas* sp. NFACC52
- Pseudomonas* sp. NFACC56
- Pseudomonas* sp. N2C3**
- Pseudomonas* sp. NFACC24
- Pseudomonas* sp. NFACC37
- Pseudomonas thivervalensis* GCA900102295
- Pseudomonas thivervalensis* GCA001269655
- Pseudomonas thivervalensis*
- Pseudomonas thivervalensis* GCA001269685
- Pseudomonas fluorescens* GCA001468775
- Pseudomonas* sp. Root401
- Pseudomonas fluorescens* Wood1R
- Pseudomonas brassicacearum* GCA001269635
- Pseudomonas* sp. WCS365**
- Pseudomonas brassicacearum* NFM421**
- Pseudomonas brassicacearum* GCA001746815
- Pseudomonas brassicacearum* 51MFCVI2
- Pseudomonas* sp. URIL14HWK12
- Pseudomonas brassicacearum* GCA000800585
- Pseudomonas fluorescens* GCA000876175
- Pseudomonas brassicacearum* GCA001449085
- Pseudomonas brassicacearum* PP1-210F
- Pseudomonas brassicacearum* GCA900103245
- Pseudomonas fluorescens* Q8r1-96
- Pseudomonas* sp. Ep R1
- Pseudomonas kilonensis*
- Pseudomonas fluorescens* F113
- Pseudomonas fluorescens* S12
- Pseudomonas* sp. A25
- Pseudomonas kilonensis* GCA001269725
- Pseudomonas* sp. CFII68
- Pseudomonas kilonensis* GCA001269885
- Pseudomonas kilonensis* GCA900105635
- Pseudomonas* sp. N2E2**
- Pseudomonas* sp. NFACC05
- Pseudomonas* sp. NFACC46
- Pseudomonas* sp. NFACC08
- Pseudomonas* sp. NFACC07
- Pseudomonas* sp. NFACC54
- Pseudomonas* sp. NFACC48
- Pseudomonas* sp. NFACC51
- Pseudomonas* sp. NFACC44
- Pseudomonas* sp. NFACC23
- Pseudomonas* sp. NFACC17
- Pseudomonas* sp. NFACC16
