# Supplementary material
Source: PubMed Central journal article supplement (PMC6776051)

# LPQ Island

# Species phylogeny

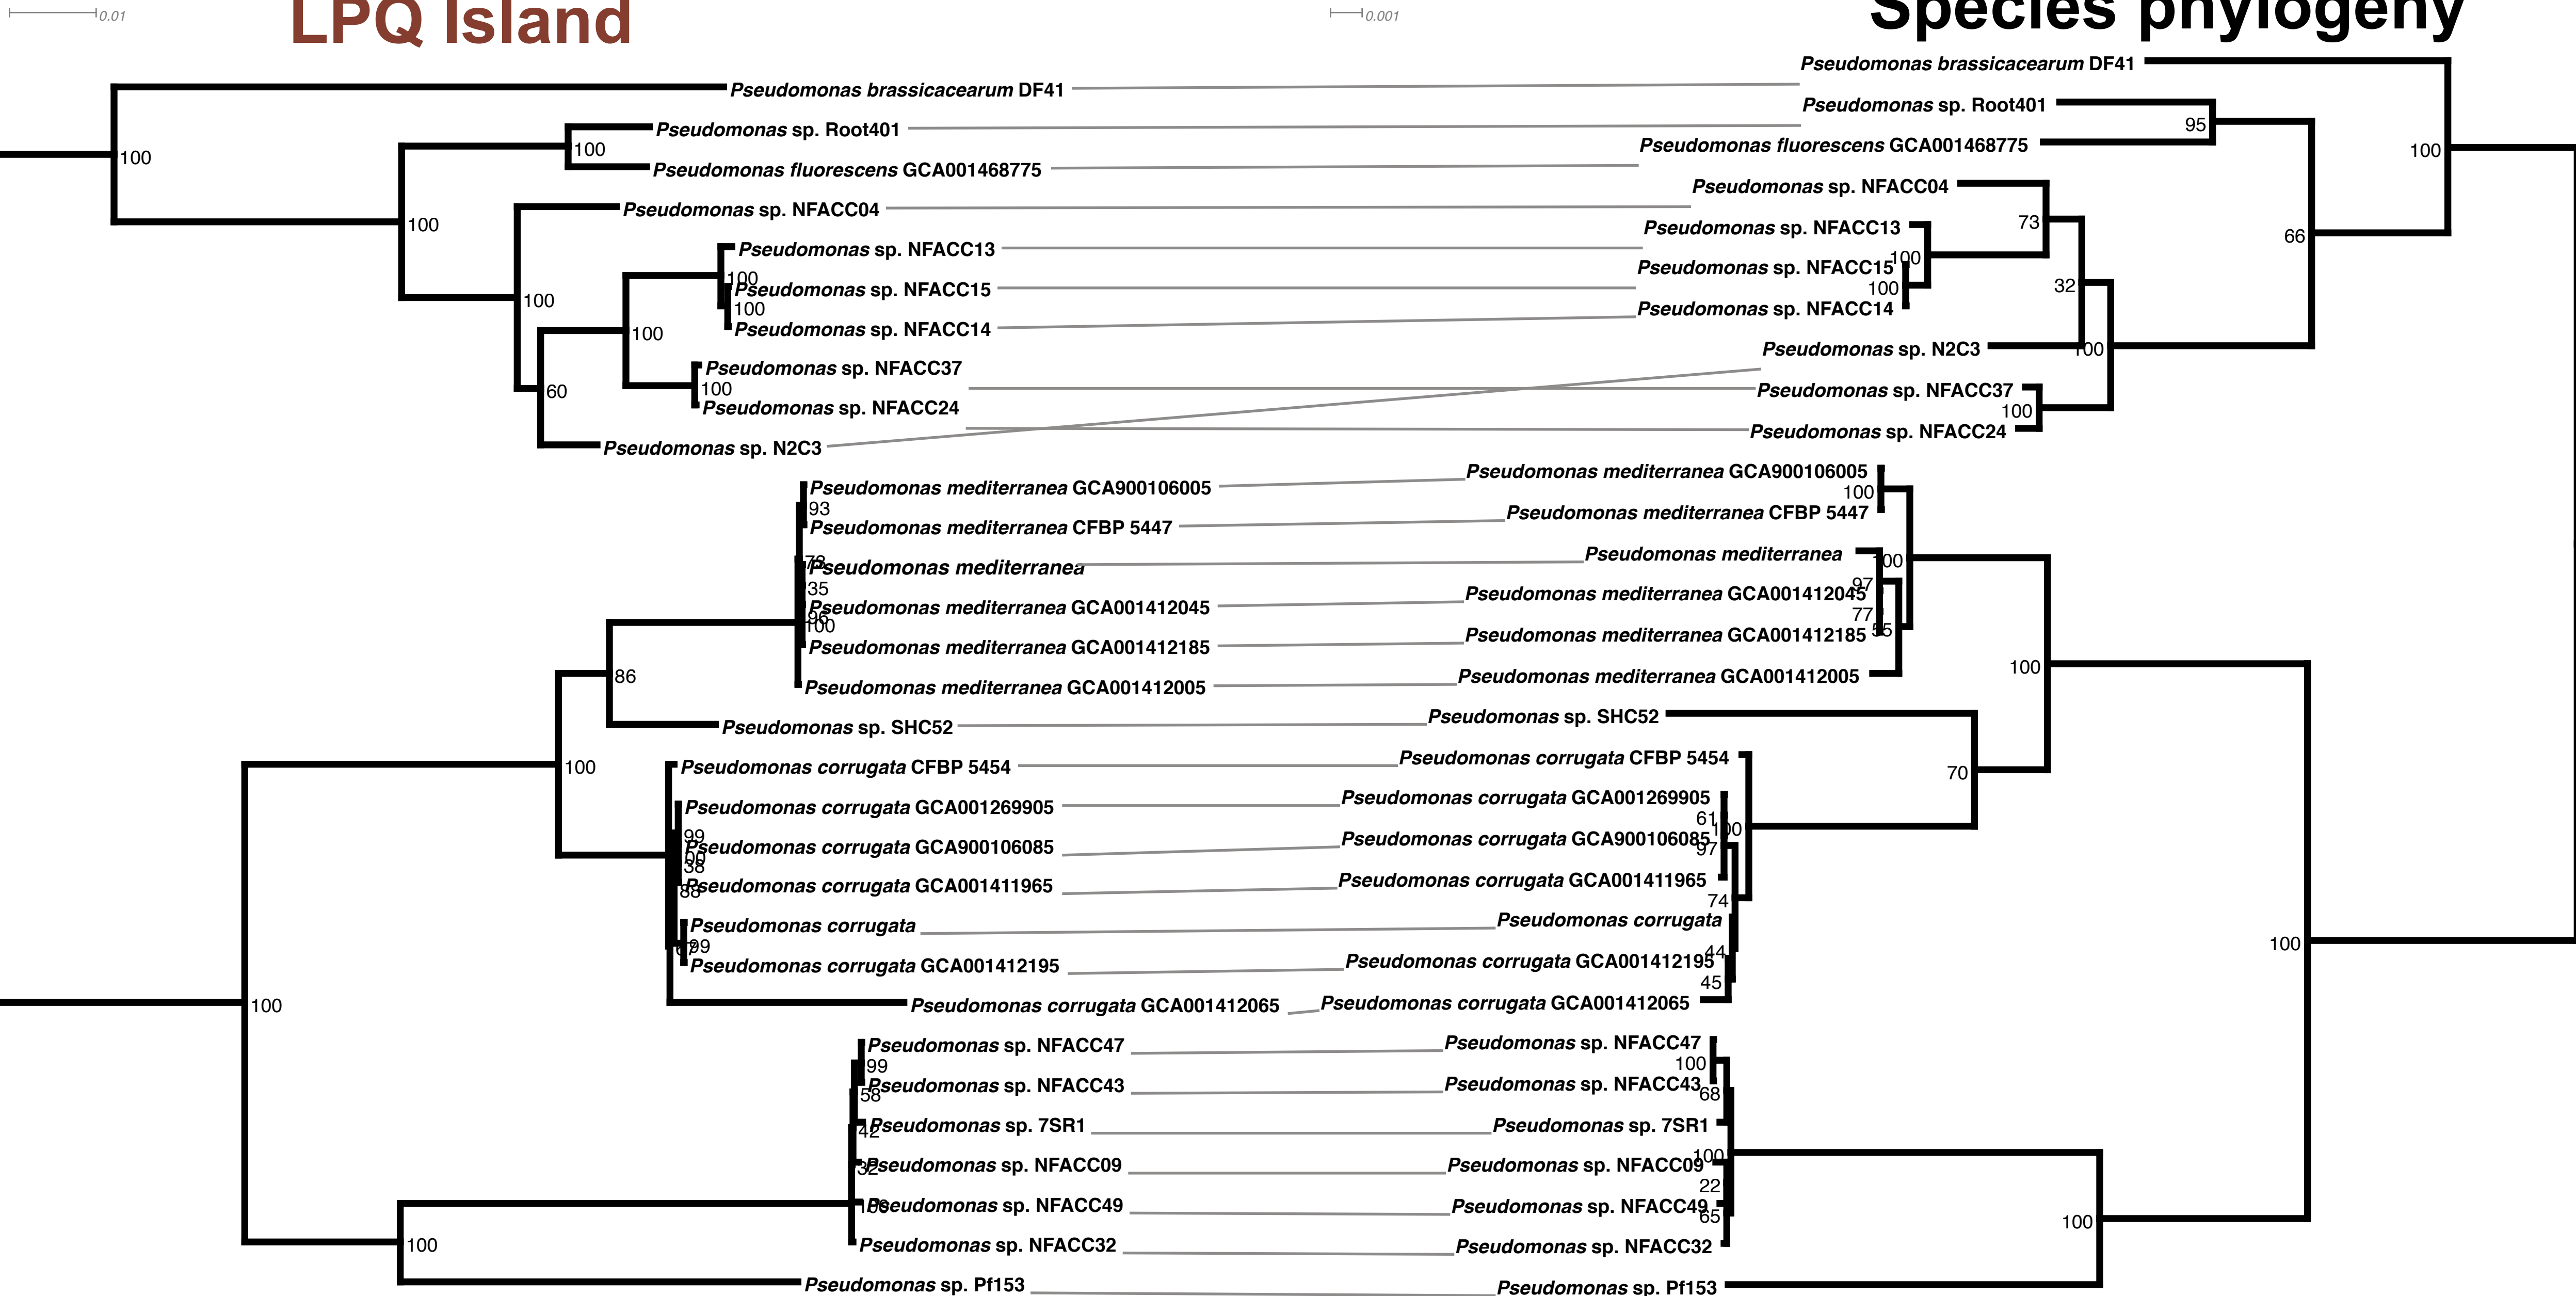

Supplement: 41396_2019_372_MOESM12_ESM.pdf [file 41396_2019_372_MOESM12_ESM.pdf]
